# Supplementary material for: Enhanced electromagnetic wave absorption of magnetic Co nanoparticles/CNTs/EG porous composites with waterproof, flame-retardant and thermal management functions
Source: Royal Society of Chemistry journal article supplement (doi:10.1039/d1ta05181d), 2021-01-01
Supplement: d1ta05181d5.pdf [file d1ta05181d5.pdf]

## Supplementary Information

### **Enhanced Electromagnetic Wave Absorption of Magnetic Co Nanoparticles/CNTs/EG Porous Composites with Waterproof, Flame-retardant and Thermal Management Functions**

Zhen Xiang, Xiaojie Zhu, YanYan Dong, Xiang Zhang, Yuyang Shi, and Wei Lu\*

Shanghai Key Lab. of D&A for Metal-Functional Materials, School of Materials  
Science & Engineering, Tongji University, Shanghai 201804, China.

\*Corresponding authors: Wei Lu, E-mail: [weilu@tongji.edu.cn](mailto:weilu@tongji.edu.cn)

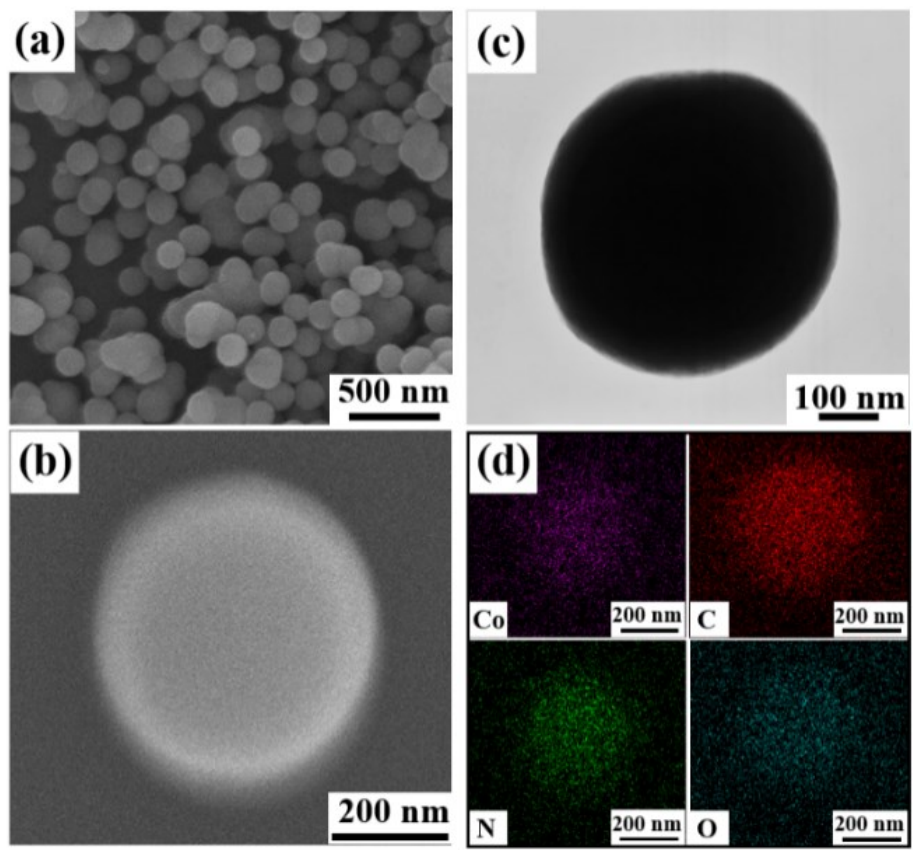

Figure S1 SEM images of (a) Co-MOFs particles, (b) a single Co-MOFs particle, (c) TEM image of Co-MOFs particle, and (d) EDS mapping of Co-MOFs particle.

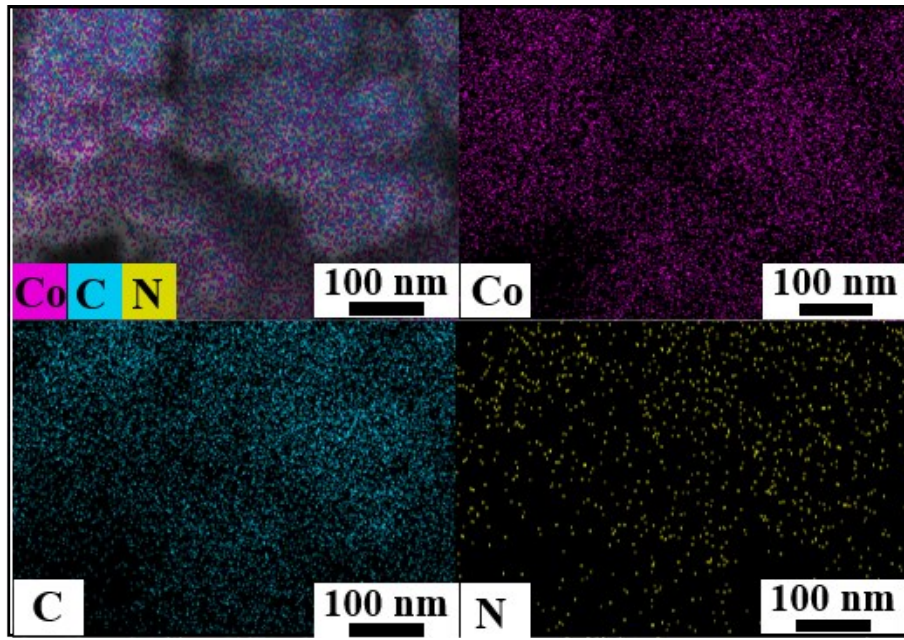

Figure S2 The EDS mapping of Co/CNTs nanocomposites.

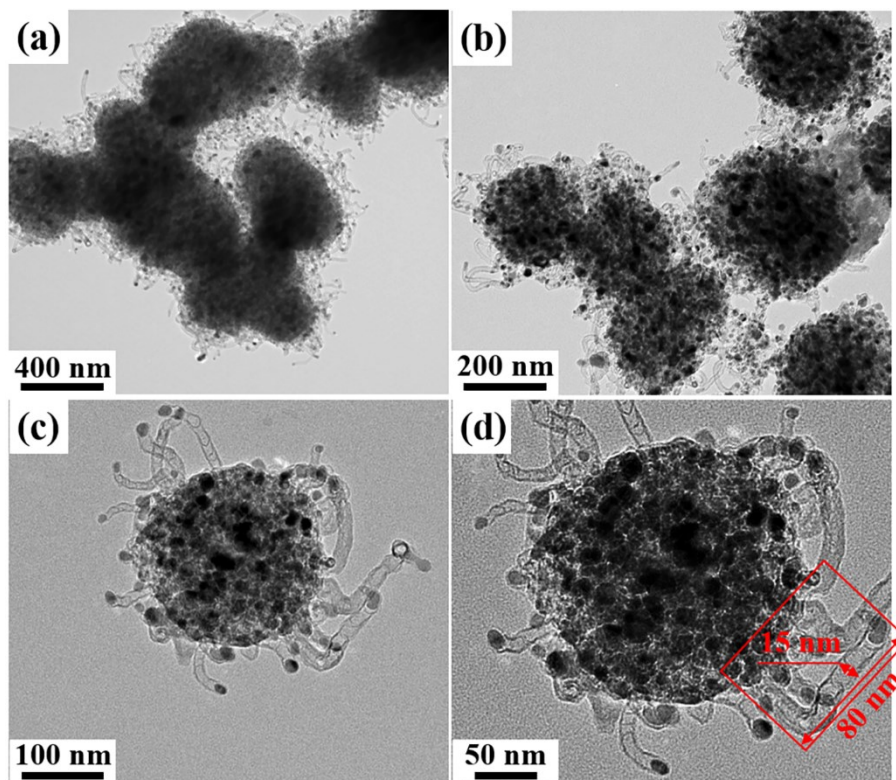

Figure S3 TEM images of Co/CNTs nanocomposites.

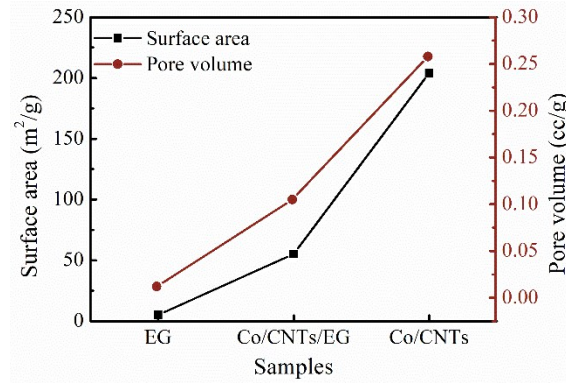

Figure S4 The surface area and total pore volume of samples.

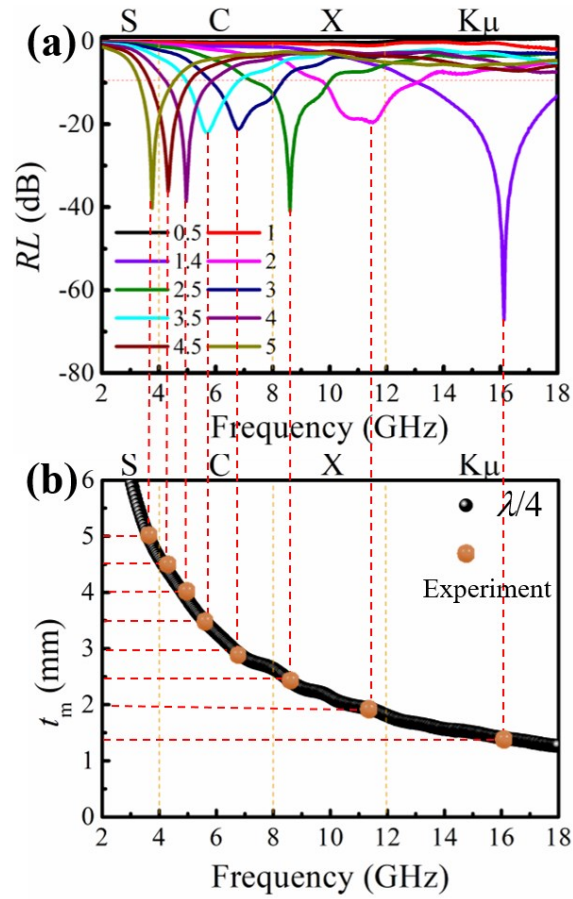

Figure S5 (a)  $RL$  values versus frequency and thicknesses, (b) The relationship between simulated matching thickness  $t_m$  and peak frequency of Co/CNTs/EG<sub>(4:3)</sub> nanocomposites.

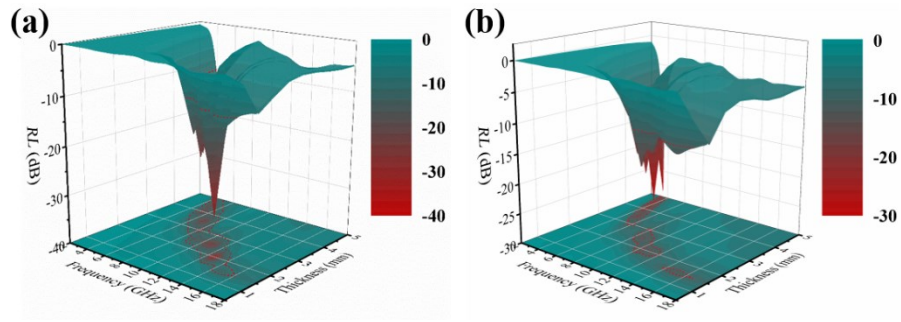

Figure S6 3D representations of  $RL$  values for (a) Co/CNTs/EG<sub>(2:1)</sub> and (b) Co/CNTs/EG<sub>(1:1)</sub>.

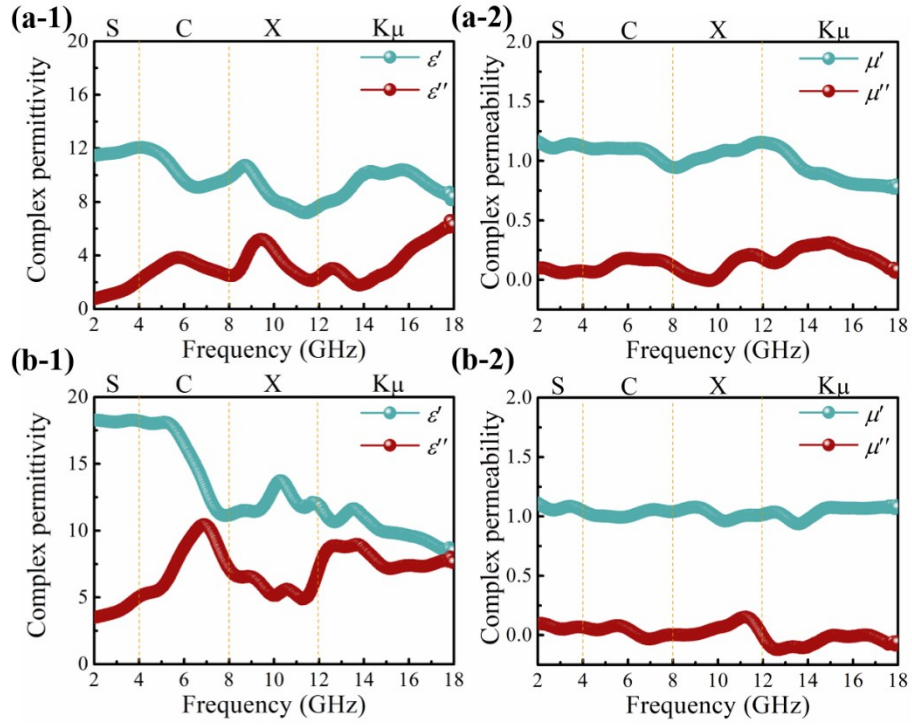

Figure S7 The frequency dependence of permittivity ( $\epsilon'$ ,  $\epsilon''$ ) and permeability ( $\mu'$ ,  $\mu''$ ) of Co/CNTs/EG<sub>(2:1)</sub> (a-1, a-2) and Co/CNTs/EG<sub>(1:1)</sub> (b-1, b-2).



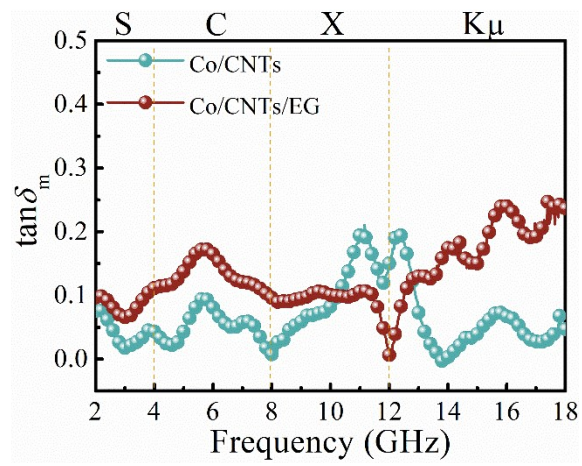

Figure S8 The frequency dependence of magnetic loss tangent ( $\tan\delta_m$ ) of Co/CNTs and Co/CNTs/EG<sub>(4:3)</sub>.

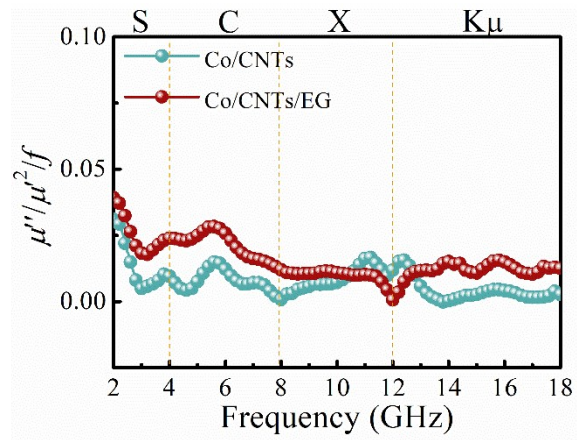

Figure S9 The frequency-dependent  $\mu''(\mu')^{-2}f^1$  values of Co/CNTs and Co/CNTs/EG<sub>(4:3)</sub>.
